# Supplementary material for: Melatonin Regulatory Mechanisms and Phylogenetic Analyses of Melatonin Biosynthesis Related Genes Extracted from Peanut under Salinity Stress
Source: PubMed Central journal article supplement (PMC7411912; doi:10.3390/plants9070854), 2020-07-06
Supplement: plants-09-00854-s001.pdf [file plants-09-00854-s001.pdf]

**Melatonin regulatory mechanisms and phylogenetic analyses implying new sequences of melatonin biosynthesis related genes extracted from peanut under salinity-induced stress**

Abdelaleim Ismail ElSayed<sup>1</sup>, Moncef Boulila<sup>2</sup>, Mohammed Suhail Rafudeen<sup>3</sup>, Azza H.

Mohamed<sup>4,5</sup>, Sonali Sengupta<sup>6</sup>, Mostafa Rady<sup>7</sup>, Ahmad A. Omar<sup>1,5\*</sup>

**Supplementary Data**

## Supplementary Tables

**Table S1.** For each protein-coding gene, a model with a BIC score (Bayesian Information Criterion) are considered to describe the substitution pattern the best. For each model, non-uniformity of evolutionary rates among sites is modeled by using a discrete Gamma distribution (+G) with 5 rate categories and by assuming that a certain fraction of sites are evolutionarily invariable (+I). Assumed or estimated values of transition/transversion bias (R) for each model as well as nucleotide frequencies (f) and rates of base substitutions (r) for each nucleotide pair, are shown. The analyses were conducted in MEGA X

| Type of protein | Model   | BIC   | +I   | +G   | R    | f(A)  | f(T)  | f(C)  | f(G)  | r(AT) | r(AC) | r(AG) | r(TA) | r(TC) | r(TG) | r(CA) | r(CT) | r(CG) | r(GA) | r(GT) | r(GC) |
|-----------------|---------|-------|------|------|------|-------|-------|-------|-------|-------|-------|-------|-------|-------|-------|-------|-------|-------|-------|-------|-------|
| ASMT1           | T92+G+I | 16059 | 0.18 | 3.29 | 1.51 | 0.277 | 0.277 | 0.223 | 0.223 | 0.055 | 0.044 | 0.135 | 0.055 | 0.135 | 0.044 | 0.055 | 0.168 | 0.044 | 0.168 | 0.055 | 0.044 |
| ASMT2           | T92+I   | 9609  | 0.37 | -    | 1.32 | 0.290 | 0.290 | 0.210 | 0.210 | 0.062 | 0.045 | 0.120 | 0.062 | 0.120 | 0.045 | 0.062 | 0.167 | 0.045 | 0.167 | 0.062 | 0.045 |
| ASMT3           | T92+G   | 13984 | -    | 1.72 | 1.25 | 0.291 | 0.291 | 0.209 | 0.209 | 0.064 | 0.046 | 0.117 | 0.064 | 0.117 | 0.046 | 0.064 | 0.164 | 0.046 | 0.164 | 0.064 | 0.046 |
| T5H             | T92+G   | 12551 | -    | 1.23 | 1.24 | 0.292 | 0.292 | 0.208 | 0.208 | 0.064 | 0.046 | 0.117 | 0.064 | 0.117 | 0.046 | 0.064 | 0.164 | 0.046 | 0.164 | 0.064 | 0.046 |
| TDC             | JC      | 4218  | -    | -    | 0.50 | 0.250 | 0.250 | 0.250 | 0.250 | 0.083 | 0.083 | 0.083 | 0.083 | 0.083 | 0.083 | 0.083 | 0.083 | 0.083 | 0.083 | 0.083 | 0.083 |

**Table S2:** Primers sequences for semi quantitative and quantitative RT-PCR of the salt-related genes in Peanut (*Arachis hypogaea* L. cv. NC-9) seedlings

| Gene name        | Reference Sequence | Direction | 5' - 3' primer sequence | T <sub>A</sub> |
|------------------|--------------------|-----------|-------------------------|----------------|
| <i>Actin</i>     | XM_002448995.1     | Forward   | CGGTGCCAATCTATGAAGGT    | 58 °C          |
|                  |                    | Reverse   | GCGAGCTTTTCCTTGATGTC    |                |
| <i>GAPDH</i>     | M64116.1           | Forward   | TTTTCGGCATCAGGAACCT     | 58 °C          |
|                  |                    | Reverse   | AGCGTCTTGCTGGGTTCAG     |                |
| <i>DHAR</i>      | AY074784           | Forward   | TCAAGAACGTGACAAAGGTGG   | 58 °C          |
|                  |                    | Reverse   | TAACGGTGGTGATGGCAAAT    |                |
| <i>SOD</i>       | MG893090.1         | Forward   | TTCGCCATGCTGGTGATCTT    | 58 °C          |
|                  |                    | Reverse   | CATGGACAACACTACGGCCCTT  |                |
| <i>CAT</i>       | GU984379           | Forward   | GGCTGCTTGAAGTTGTTCTCCT  | 58 °C          |
|                  |                    | Reverse   | CTGCTAGTACCTCCTGATCCGTT |                |
| <i>APX</i>       | KU747079.1         | Forward   | TGGCCTGCTCTTCCTCTAGT    | 58 °C          |
|                  |                    | Reverse   | CATGCCACGCTAATCGAAGC    |                |
| <i>GR</i>        | KX828561.1         | Forward   | CAACGCGCTTTGGTAACTCC    | 58 °C          |
|                  |                    | Reverse   | GGGCCCTAATGAAGTGGAGG    |                |
| <i>I-Cys-Prx</i> | AY304482           | Forward   | AATGGACCAAGGACATCGAG    | 58 °C          |
|                  |                    | Reverse   | GACGGGTACAGGAAGCTCAG    |                |
| <i>PrxQ</i>      | AY789643           | Forward   | ACTTCACGCTCAAGGACCAG    | 58 °C          |
|                  |                    | Reverse   | CCGCCTTCTTGTACTTCTCG    |                |
| <i>ASMT1</i>     | XM_021776730.1     | Forward   | GTTCAGCGATGGAGAGAGCA    | 58 °C          |
|                  |                    | Reverse   | GACCAGCACCATCATGTCCA    |                |
| <i>ASMT2</i>     | XM_021743110.1     | Forward   | CATTCCGGAGTTGGCTTCTG    | 58 °C          |
|                  |                    | Reverse   | GTCCATGAAGAGCCTTGCCC    |                |
| <i>ASMT3</i>     | XM_021778135.1     | Forward   | TTGGTCAGCGGAGAAACCATA   | 58 °C          |
|                  |                    | Reverse   | CGGTCTGCTGCTCATTCCA     |                |
| <i>TDC</i>       | XM_021773503.1     | Forward   | AATTGGCTTGCTTACCTGC     | 58 °C          |
|                  |                    | Reverse   | TCGGATTTACGAACCCCTC     |                |
| <i>T5H</i>       | KU361333.1         | Forward   | CTCTTGCAATTCGGGCACAA    | 58 °C          |
|                  |                    | Reverse   | TGGACTGTTGTCTTGGGAGG    |                |

**Table S3.** Description of 5 protein-coding genes extracted from different plant hosts and their corresponding accession numbers. The asterisk indicates the sequence amplified from *Arachis hypogaea* (this study)

| Gene                    | Protein                                       | Plant host                 | Accession Numbers |
|-------------------------|-----------------------------------------------|----------------------------|-------------------|
| ASMT1                   | trans-resveratrol di-O-methyltransferase-like | <i>Manihot esculenta</i>   | XM_021776730      |
|                         |                                               | <i>Manihot esculenta</i>   | KU361334          |
|                         |                                               | <i>Ricinus communis</i>    | XM_002517788      |
|                         |                                               | <i>Jatropha curcas</i>     | XM_012232806      |
|                         |                                               | <i>Hevea brasiliensis</i>  | XM_021780880      |
|                         |                                               | <i>Populus trichocarpa</i> | XM_006376319      |
|                         |                                               | <i>Populus euphratica</i>  | XM_011017935      |
|                         |                                               | <i>Populus euphratica</i>  | XM_011039135      |
|                         |                                               | <i>Populus trichocarpa</i> | XM_006376326      |
|                         |                                               | <i>Populus euphratica</i>  | XM_011039139      |
|                         |                                               | <i>Populus euphratica</i>  | XM_011039138      |
|                         |                                               | <i>Populus tomentosa</i>   | KU573528          |
|                         |                                               | <i>Populus tomentosa</i>   | KU573526          |
|                         |                                               | <i>Populus trichocarpa</i> | XM_006388352      |
|                         |                                               | <i>Populus trichocarpa</i> | XM_024583677      |
|                         |                                               | <i>Camellia sinensis</i>   | XM_028230135      |
|                         |                                               | <i>Camellia sinensis</i>   | XM_028230134      |
|                         |                                               | <i>Cucurbita pepo</i>      | XM_023672670      |
|                         |                                               | <i>Cucurbita pepo</i>      | XM_023664984      |
| <i>Arachis hypogaea</i> | MK692547*                                     |                            |                   |
| ASMT2                   | trans-resveratrol di-O-methyltransferase-like | <i>Manihot esculenta</i>   | KU361335          |
|                         |                                               | <i>Hevea brasiliensis</i>  | XM_021781757      |
|                         |                                               | <i>Hevea brasiliensis</i>  | XM_021804804      |
|                         |                                               | <i>Hevea brasiliensis</i>  | XM_021804803      |
|                         |                                               | <i>Manihot esculenta</i>   | XM_021741228      |
|                         |                                               | <i>Jatropha curcas</i>     | XM_012236290      |
|                         |                                               | <i>Populus trichocarpa</i> | XM_002305068      |
|                         |                                               | <i>Populus trichocarpa</i> | XM_006377369      |
|                         |                                               | <i>Populus tomentosa</i>   | KU573180          |
|                         |                                               | <i>Populus euphratica</i>  | XM_011029456      |
|                         |                                               | <i>Populus euphratica</i>  | XM_011002913      |
|                         |                                               | <i>Populus tomentosa</i>   | KU573418          |
|                         |                                               | <i>Arachis hypogaea</i>    | MK692548*         |
| ASMT3                   | trans-resveratrol di-O-methyltransferase-like | <i>Manihot esculenta</i>   | KU361336          |
|                         |                                               | <i>Manihot esculenta</i>   | XM_021746582      |
|                         |                                               | <i>Manihot esculenta</i>   | XM_021746581      |
|                         |                                               | <i>Manihot esculenta</i>   | XM_021776846      |
|                         |                                               | <i>Hevea brasiliensis</i>  | XM_021780880      |
| <i>Jatropha curcas</i>  | XM_012219747                                  |                            |                   |

|     |                          |                                         |              |
|-----|--------------------------|-----------------------------------------|--------------|
|     |                          | <i>Jatropha curcas</i>                  | XM_012219749 |
|     |                          | <i>Jatropha curcas</i>                  | XM_012219766 |
|     |                          | <i>Ziziphus jujuba</i>                  | XM_016025977 |
|     |                          | <i>Manihot esculenta</i>                | XM_021746583 |
|     |                          | <i>Tabernanthe<br/>iboganoribogaine</i> | MH454075     |
|     |                          | <i>Arachis hypogaea</i>                 | MK692549*    |
| T5H | tryptamine 5-hydroxylase | <i>Manihot esculenta</i>                | XM_021758913 |
|     |                          | <i>Manihot esculenta</i>                | KU361333     |
|     |                          | <i>Hevea brasiliensis</i>               | XM_021825819 |
|     |                          | <i>Hevea brasiliensis</i>               | XM_021825798 |
|     |                          | <i>Gossypium raimondii</i>              | XM_012602341 |
|     |                          | <i>Gossypium raimondii</i>              | XM_012613223 |
|     |                          | <i>Gossypium arboreum</i>               | XM_017778124 |
|     |                          | <i>Arachis hypogaea</i>                 | MK704498*    |
